# Supplementary material for: Fabrication of dual-functional composite yarns with a nanofibrous envelope using high throughput AC needleless and collectorless electrospinning
Source: PubMed Central journal article supplement (PMC6372629; doi:10.1038/s41598-019-38557-z), 2019-02-12
Supplement: 41598_2019_38557_MOESM9_ESM.pdf [file 41598_2019_38557_MOESM9_ESM.pdf]

# **Fabrication of dual-functional composite yarns with a nanofibrous envelope using high throughput AC needleless and collectorless electrospinning**

Jan Valtera<sup>1</sup>, Tomas Kalous<sup>2</sup>, Pavel Pokorny<sup>2</sup>, Ondrej Batka<sup>1</sup>, Martin Bilek<sup>1</sup>, Jiri Chvojka<sup>2</sup>, Petr Mikes<sup>2</sup>, Eva Kuzelova Kostakova<sup>2</sup>, Petr Zabka<sup>1</sup>, Jana Ornstova<sup>2</sup>, Jaroslav Beran<sup>1</sup>, Andrei Stanishevsky<sup>3</sup> and David Lukas<sup>2,\*</sup>

<sup>1</sup>Technical University of Liberec, Faculty of Mechanical Engineering, Liberec, 46117, Czech Republic

<sup>2</sup>Technical University of Liberec, Faculty of Textile Engineering, Liberec, 46117, Czech Republic

<sup>3</sup>Department of Physics, University of Alabama at Birmingham, 1300 University Boulevard, Birmingham, Alabama 35294

## **Supplementary Information:**

Supplementary information 1 – The nanofibre plume produced by the AC spinning method.

Supplementary information 2 – The nanofibre plume produced by the AC spinning method; high-speed camera recording.

Supplementary information 3 – The nanofibre plume wrapping around the ballooning yarn core.

Supplementary information 4 – The nanofibre plume wrapping around the ballooning yarn core; high-speed camera recording.

Supplementary information 5 – The process of the nanofibrous plume wrapping around the ballooning yarn core, documenting its partial elasticity; video recording from a high-speed camera.

Supplementary information 6 – Ballooning core of the yarn when the yarn stress is changing.

Supplementary information 7 – The ballooning yarn core; high-speed camera recording.

Supplementary information 8 – The ballooning yarn core being enwrapped by a plume of nanofibres when the yarn stress is changing.
